# Supplementary material for: Alkylation of α-pinene with isobutene/isobutane over Hβ zeolite
Source: Royal Society of Chemistry journal article supplement (doi:10.1039/d4ya00291a), 2024-01-01
Supplement: d4ya00291a1.pdf [file d4ya00291a1.pdf]

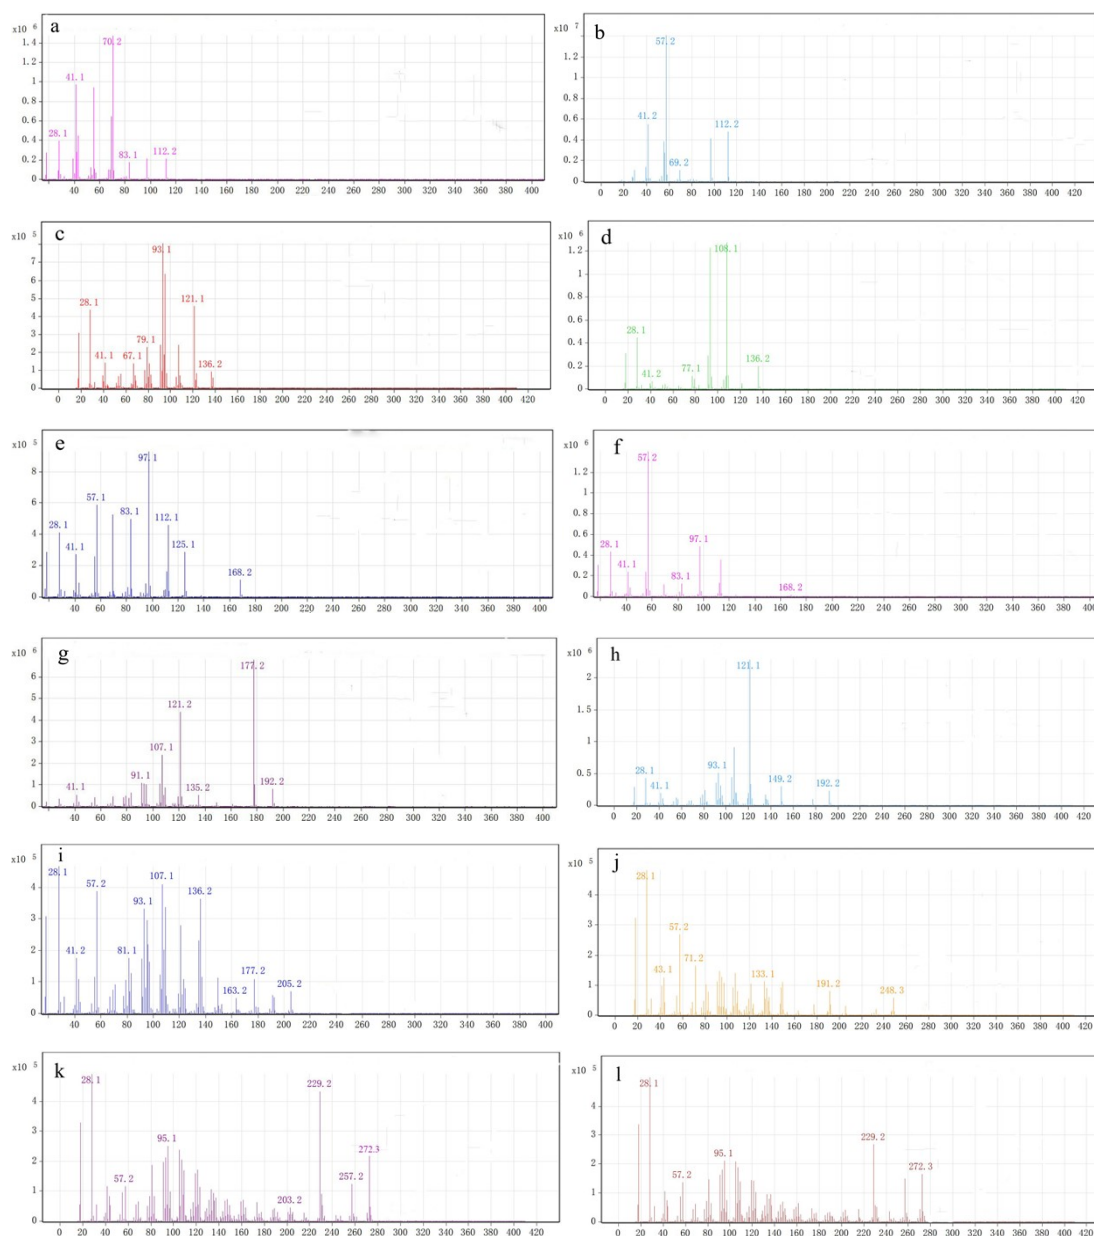

Fig. S1 Typical mass spectra of the alkylation products of  $\alpha$ -pinene with Isobut-5  
a, b- $C_8H_{16}$ ; c, d- $C_{10}H_{16}$ ; e, f- $C_{12}H_{24}$ ; g, h- $C_{14}H_{24}$ ; i- $C_{15}H_{26}$ ; j- $C_{18}H_{28}$ ; k, l- $C_{20}H_{32}$

Table S1 Molecular size of reactants and products in alkylation system of  $\alpha$ -pinene with Isobut-5

| Typical chemical formula                                                            | Molecular formula | Optimized structure                                                                  | Diameter/nm |
|-------------------------------------------------------------------------------------|-------------------|--------------------------------------------------------------------------------------|-------------|
|    | $C_4H_8$          |    | 0.40        |
|    | $C_8H_{18}$       |    | 0.52        |
|    | $C_{10}H_{16}$    |    | 0.58        |
|    | $C_{10}H_{16}$    |    | 0.56        |
|    | $C_{10}H_{14}$    |    | 0.56        |
|    | $C_{14}H_{24}$    |    | 0.61        |
|  | $C_{14}H_{24}$    |  | 0.61        |
|  | $C_{14}H_{24}$    |  | 0.63        |
|  | $C_{20}H_{32}$    |  | 0.73        |
|  | $C_{20}H_{32}$    |  | 0.69        |
|  | $C_{20}H_{34}$    |  | 0.71        |

Table S2 Physicochemical properties of various zeolites

| Sample   | Si/Al <sup>a</sup> | Acidity <sup>b</sup><br>(mmolNH <sub>3</sub> /g) |        |       | 120 °C <sup>c</sup>               |     |                                | 180 °C <sup>c</sup>               |      |                                | 250 °C <sup>c</sup>               |      |                                |
|----------|--------------------|--------------------------------------------------|--------|-------|-----------------------------------|-----|--------------------------------|-----------------------------------|------|--------------------------------|-----------------------------------|------|--------------------------------|
|          |                    | Weak                                             | Medium | Total | C <sub>BRONSTED</sub><br>(μmol/g) | B/L | C <sub>LEWIS</sub><br>(μmol/g) | C <sub>BRONSTED</sub><br>(μmol/g) | B/L  | C <sub>LEWIS</sub><br>(μmol/g) | C <sub>BRONSTED</sub><br>(μmol/g) | B/L  | C <sub>LEWIS</sub><br>(μmol/g) |
|          |                    |                                                  |        |       |                                   |     |                                |                                   |      |                                |                                   |      |                                |
| Hβ-25n   | 14.0               | 0.46                                             | 0.17   | 0.63  | 102                               | 2.6 | 39                             | 90                                | 3.3  | 27                             | 68                                | 3.6  | 19                             |
| HY       | 1.8                | 1.55                                             | 0.18   | 1.73  | 370                               | 0.7 | 536                            | 240                               | 0.9  | 269                            | 126                               | 1.1  | 116                            |
| HZSM-5   | 7.7                | 0.78                                             | 0.31   | 1.09  | 166                               | 7.5 | 22                             | 135                               | 20.2 | 7                              | 94                                | 27.7 | 3                              |
| HZSM-35  | 11.6               | 0.50                                             | 0.30   | 0.80  | 79                                | 4.1 | 19                             | 63                                | 8.8  | 7                              | 45                                | 13.4 | 3                              |
| HSAPO-11 | 0.1                | 0.50                                             | 0.08   | 0.58  | 56                                | 1.0 | 54                             | 40                                | 3.2  | 12                             | 28                                | 4.7  | 6                              |

<sup>a</sup> Determined by XRF.

<sup>b</sup> Estimated from NH<sub>3</sub>-TPD profiles.

<sup>c</sup> Determined by FT-IR/pyridine desorption.

Table S3 Textural properties of various zeolites

| Samples  | V <sub>micro</sub> <sup>a</sup><br>(cm <sup>3</sup> /g) | V <sub>meso</sub> <sup>b</sup><br>(cm <sup>3</sup> /g) | V <sub>total</sub> <sup>c</sup><br>(cm <sup>3</sup> /g) | S <sub>BET</sub> <sup>d</sup><br>(m <sup>2</sup> /g) | S <sub>micro</sub> <sup>e</sup><br>(m <sup>2</sup> /g) | S <sub>exter</sub> <sup>f</sup><br>(m <sup>2</sup> /g) |
|----------|---------------------------------------------------------|--------------------------------------------------------|---------------------------------------------------------|------------------------------------------------------|--------------------------------------------------------|--------------------------------------------------------|
| Hβ-25n   | 0.18                                                    | 0.14                                                   | 0.41                                                    | 724.8                                                | 461.8                                                  | 262.9                                                  |
| HY       | 0.31                                                    | 0.05                                                   | 0.40                                                    | 951.6                                                | 812.6                                                  | 139.0                                                  |
| HZSM-5   | 0.11                                                    | 0.03                                                   | 0.19                                                    | 405.7                                                | 292.1                                                  | 113.5                                                  |
| HZSM-35  | 0.10                                                    | 0.06                                                   | 0.18                                                    | 313.4                                                | 267.8                                                  | 45.5                                                   |
| HSAPO-11 | 0.02                                                    | 0.12                                                   | 0.15                                                    | 90.9                                                 | 58.7                                                   | 32.2                                                   |

<sup>a</sup> V<sub>micro</sub>, micropore volume.

<sup>b</sup> V<sub>meso</sub>, mesopore volume.

<sup>c</sup> V<sub>total</sub>, total pore volume measured at P/P<sub>0</sub>=0.98.

<sup>d</sup> S<sub>BET</sub>, total specific surface area.

<sup>e</sup> S<sub>micro</sub>, micropore surface area.

<sup>f</sup> S<sub>exter</sub>, external and mesopore surface area.

Table S4 Structure properties of Hβ-25n, Hβ-25m, and Hβ-50m

| Sample | Si/Al    |                       | Particle size <sup>b</sup><br>(nm) | D(4,3) <sup>c</sup><br>(μm) | D(3,2) <sup>d</sup><br>(μm) | S <sub>BET</sub><br>(m <sup>2</sup> /g) | S <sub>micro</sub><br>(m <sup>2</sup> /g) | S <sub>exter</sub><br>(m <sup>2</sup> /g) | V <sub>micro</sub><br>(cm <sup>3</sup> /g) | V <sub>meso</sub><br>(cm <sup>3</sup> /g) | V <sub>total</sub><br>(cm <sup>3</sup> /g) |
|--------|----------|-----------------------|------------------------------------|-----------------------------|-----------------------------|-----------------------------------------|-------------------------------------------|-------------------------------------------|--------------------------------------------|-------------------------------------------|--------------------------------------------|
|        | Rational | Measured <sup>a</sup> |                                    |                             |                             |                                         |                                           |                                           |                                            |                                           |                                            |
| Hβ-25n | 12.5     | 14.0                  | 88                                 | 1.29                        | 0.06                        | 724                                     | 461.8                                     | 262.9                                     | 0.18                                       | 0.14                                      | 0.41                                       |
| Hβ-25m | 12.5     | 12.0                  | 103                                | 0.56                        | 0.06                        | 572                                     | 454.6                                     | 117.8                                     | 0.17                                       | 0.14                                      | 0.35                                       |
| Hβ-50m | 25.0     | 19.2                  | 100                                | 0.93                        | 0.06                        | 623                                     | 492.7                                     | 134.1                                     | 0.19                                       | 0.15                                      | 0.38                                       |

<sup>a</sup> Determined by XRF.

<sup>b</sup> Median particle size: particles with a particle size distribution of 50%.

<sup>c</sup> Volume average particle size: the weighted average of particle size versus volume;

<sup>d</sup> Average particle size of surface area, which is the weighted average of particle size over surface area.

Table S5 Acid properties of Hβ-25n, Hβ-25m, and Hβ-50m

| Sample | Acidity <sup>a</sup> (mmolNH <sub>3</sub> /g) |        |       | 120 °C <sup>b</sup>            |     |                             |
|--------|-----------------------------------------------|--------|-------|--------------------------------|-----|-----------------------------|
|        | Weak                                          | Medium | Total | C <sub>BRONSTED</sub> (μmol/g) | B/L | C <sub>LEWIS</sub> (μmol/g) |
| Hβ-25n | 0.63                                          | 0.23   | 0.86  | 102                            | 2.6 | 39                          |
| Hβ-25m | 0.55                                          | 0.20   | 0.75  | 80                             | 0.4 | 178                         |
| Hβ-50m | 0.47                                          | 0.20   | 0.67  | 43                             | 0.2 | 311                         |

<sup>a</sup> Estimated from NH<sub>3</sub>-TPD profiles.

<sup>b</sup> Determined by FT-IR/pyridine desorption.

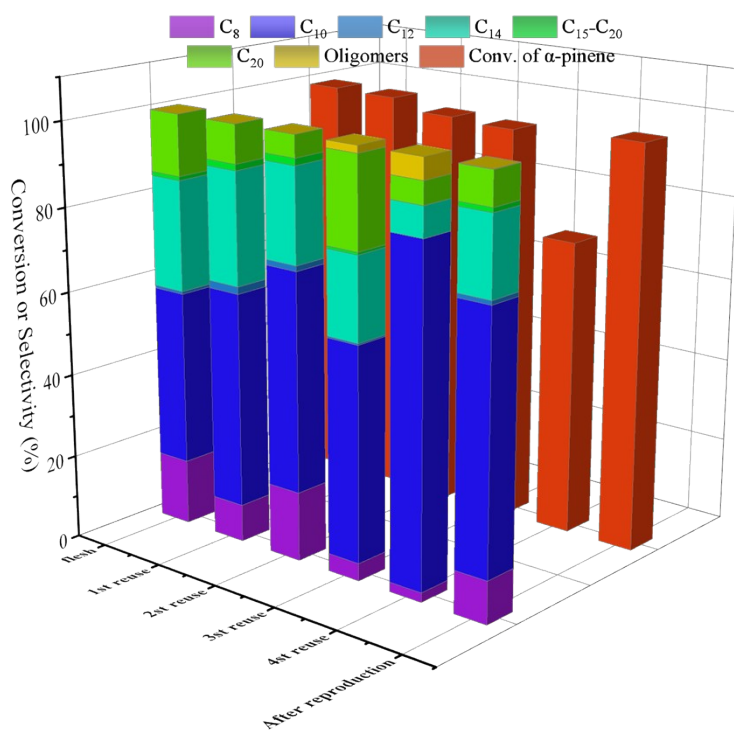

Fig S2 Reuse performance of Hβ-25n catalyst for the alkylation of α-pinene and Isobut-5
